# Supplementary material for: The role of retrotransposons in gene family expansions: insights from the mouse Abp gene family
Source: PubMed Central journal article supplement (PMC3669608; doi:10.1186/1471-2148-13-107), 2013-05-29
Supplement: 1471-2148-13-107-S2.pdf [file 1471-2148-13-107-S2.pdf]

chr4:59.9–61.9 (Mb)

60.1

59.9

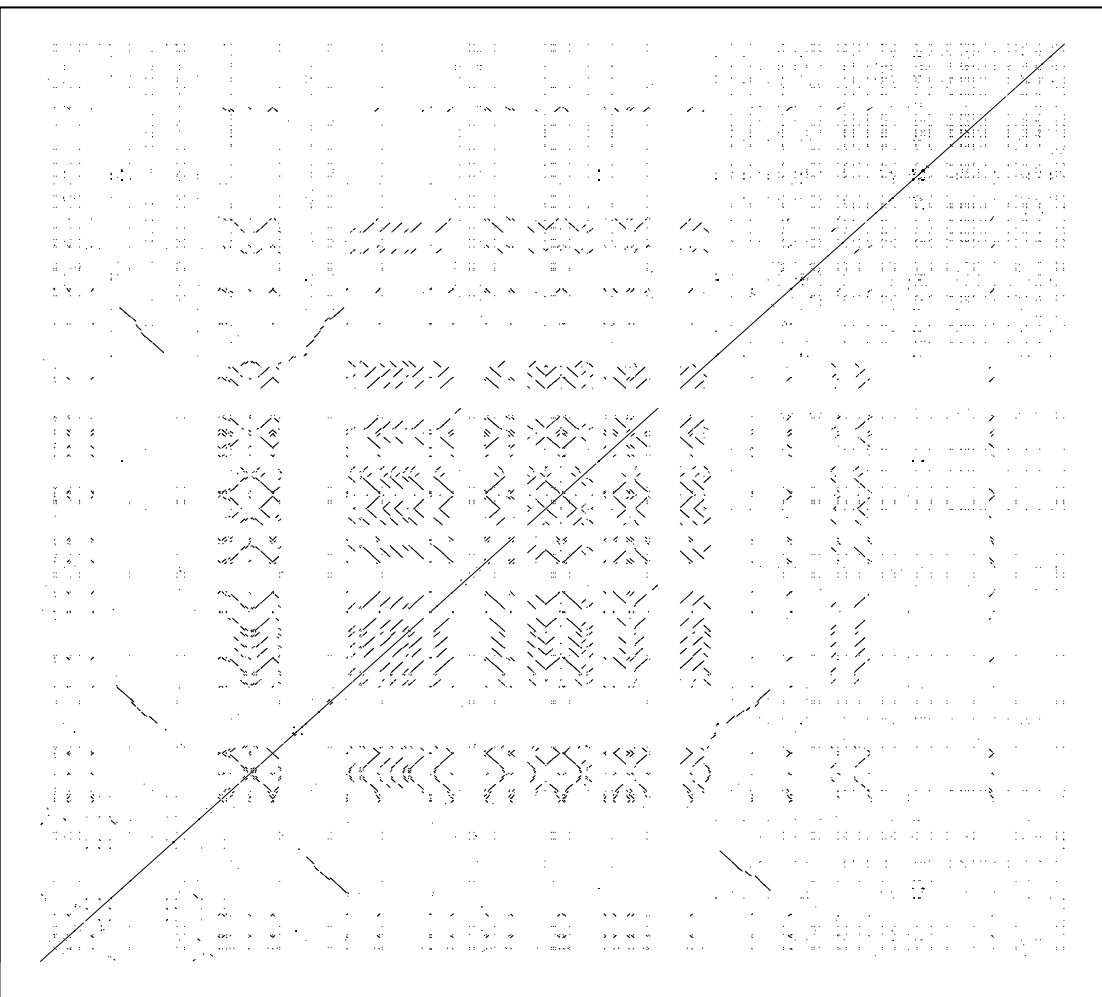

59.9

60.1

chr4:59.9–61.9 (Mb)
